# Supplementary material for: Copper perchlorate and tetrafluoridoborate compounds with the ligand 1,4,5-triazanaphthalene. Gradual transformation of mononuclear Cu(ii) compounds via polynuclear mixed-valence Cu(ii)/Cu(i) species to dinuclear Cu(i); syntheses, characterizations and X-ray structures
Source: Royal Society of Chemistry journal article supplement (doi:10.1039/c2dt12085b), 2012-01-01
Supplement: c2dt12085b.pdf [file c2dt12085b.pdf]

## SUPPLEMENTARY MATERIAL to the paper:

**Copper perchlorate and tetrafluoridoborate compounds with the ligand 1,4,5-triazanaphthalene. Gradual transformation of mononuclear Cu(II) compounds via polynuclear mixed-valence Cu(II)/Cu(I) species to dinuclear Cu(I); syntheses, characterizations and X-ray structures.**

**Gerard A. van Albada<sup>(1)</sup>, Ilpo Mutikainen<sup>(2)</sup>, Mohamed Ghazzali<sup>(3)</sup>, Khalid Al-Farhan<sup>(3)</sup> and Jan Reedijk<sup>(1, 3,\*)</sup>.**

<sup>(1)</sup> Leiden Institute of Chemistry, Gorlaeus Laboratories, Leiden University, P.O. Box 9502, 2300 RA Leiden, The Netherlands.

<sup>(2)</sup> Laboratory of Inorganic Chemistry, Department of Chemistry, P.O. Box 55 (A.I. Virtasen aukio 1), 00014 University of Helsinki, Finland.

<sup>(3)</sup> Department of Chemistry, College of Science, King Saud University, P.O. Box 2455 Riyadh 11451, Kingdom of Saudi Arabia

### List of Contents of the Supplementary Material

Figure S1: Photo 1, microscope camera snapshots showing the colour change from red to blue crystals or vice versa.

Figure S2: Photo 2. Example of microscope camera snapshot showing the red crystals of **5** and **5A** as a block-like and a needle-like form.

Figure S3: Atomic displacement plot (30% probability level) of the molecular structure of violet compound  $[\text{Cu}(\text{tan})_4](\text{BF}_4)_2(\text{CH}_3\text{OH})_{1.5}(\text{H}_2\text{O})$  (**3**).

Figure S4: Packing diagram for compound **2**, as seen along Y axis.

Figure S5: Packing diagram for compound **7**, as seen along Y axis.

Figure S6: IR Spectra in the Range  $1800\text{-}400\text{ cm}^{-1}$  for the compounds **2**, **4**, **5**, **6** and **7**

Table S1: Relevant parts of the vibrational spectra for compounds **2**, **4**, **5**, **6** and **7**

References

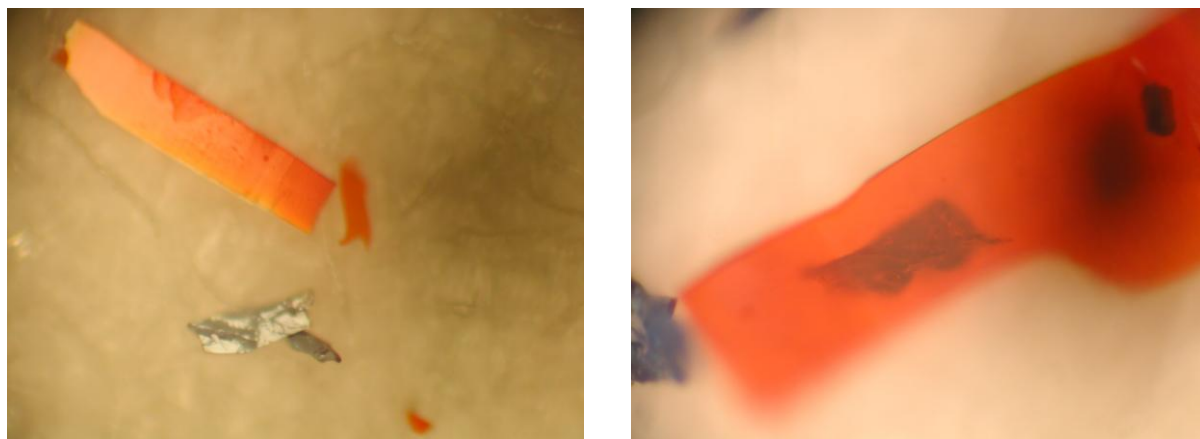

Figure S1: Photo 1, microscope camera snapshots showing the colour change from red to blue crystals or vice versa.

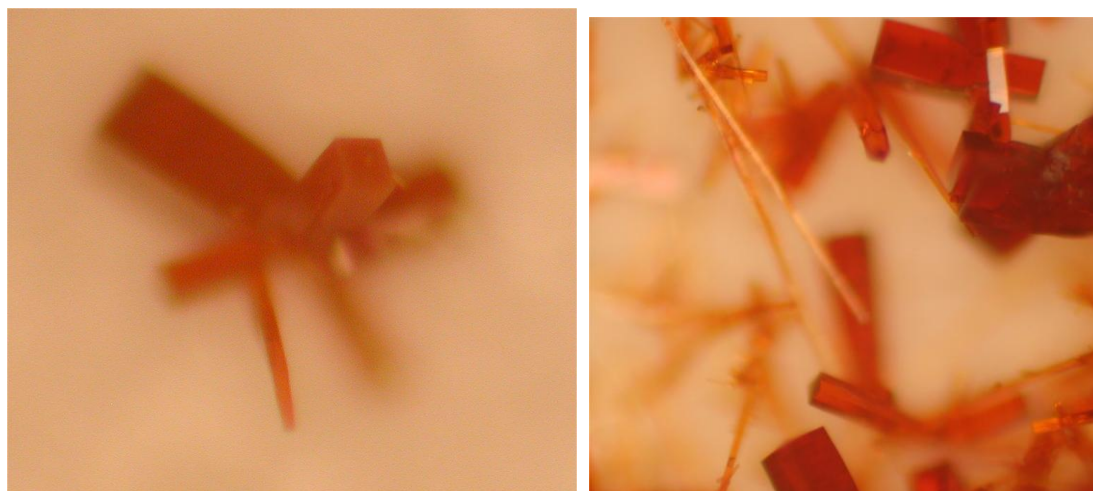

Figure S2: Photo 2. Example of microscope camera snapshot showing the red crystals of **5** and **5A** as a block-like and a needle-like form.

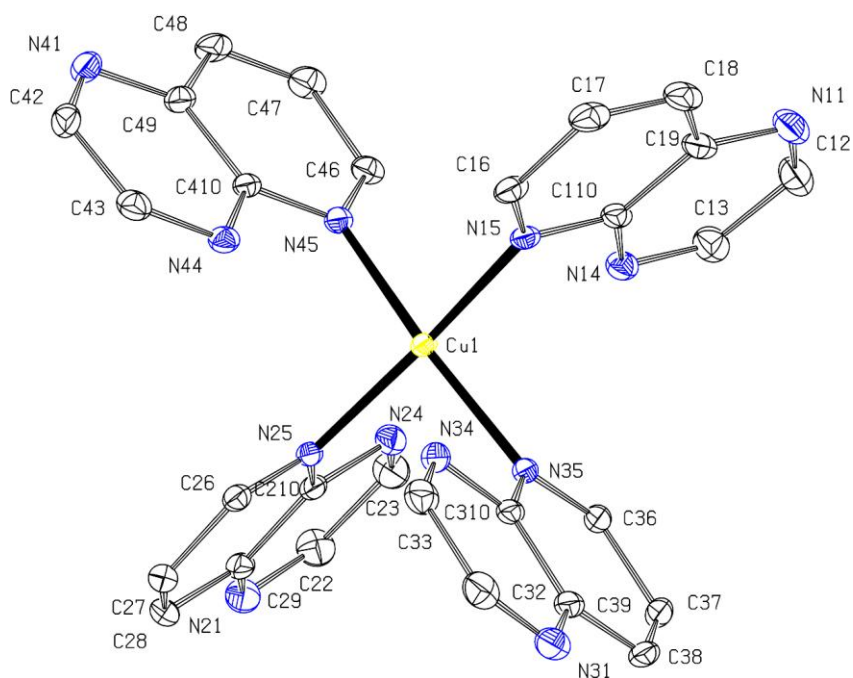

Figure S3: Atomic displacement plot (30% probability level) of the molecular structure of the purple compound  $[\text{Cu}(\text{tan})_4](\text{BF}_4)_2(\text{CH}_3\text{OH})_{1.5}(\text{H}_2\text{O})$  (**3**). Hydrogen atoms, anions and non-coordinating methanol and water molecules are omitted for clarity.

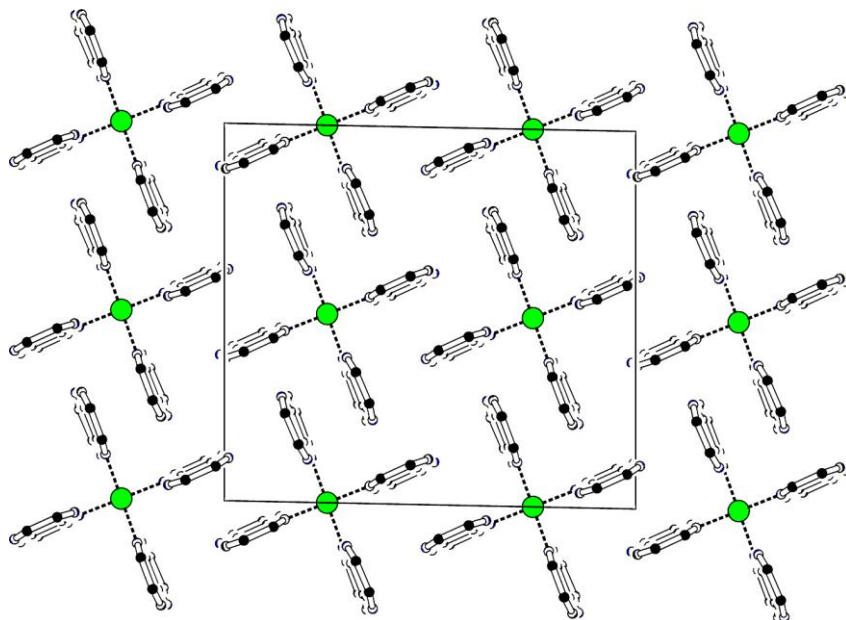

Figure S4. Packing figure of compound **2** along Y axis. Hydrogen atoms, anions and water molecules are omitted for clarity.

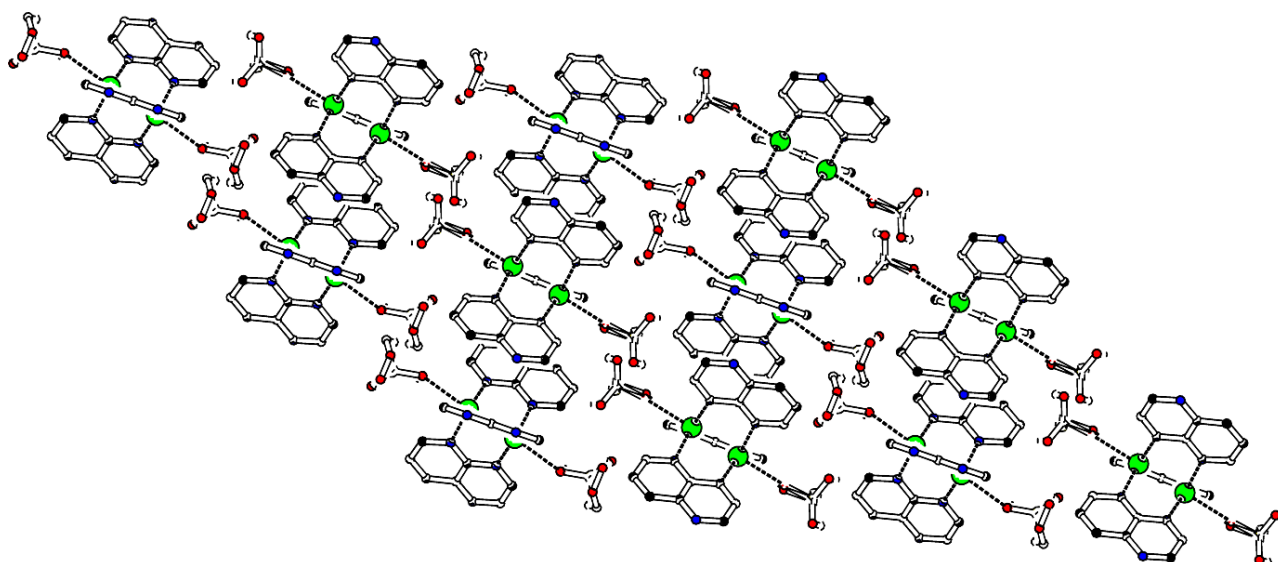

Figure S5. Packing figure of compound **7** along Y axis. Hydrogen atoms are omitted for clarity.

Figure S6: IR Spectra in the range 1800-400  $\text{cm}^{-1}$  for compounds **2**, **4**, **5**, **6** and **7**.

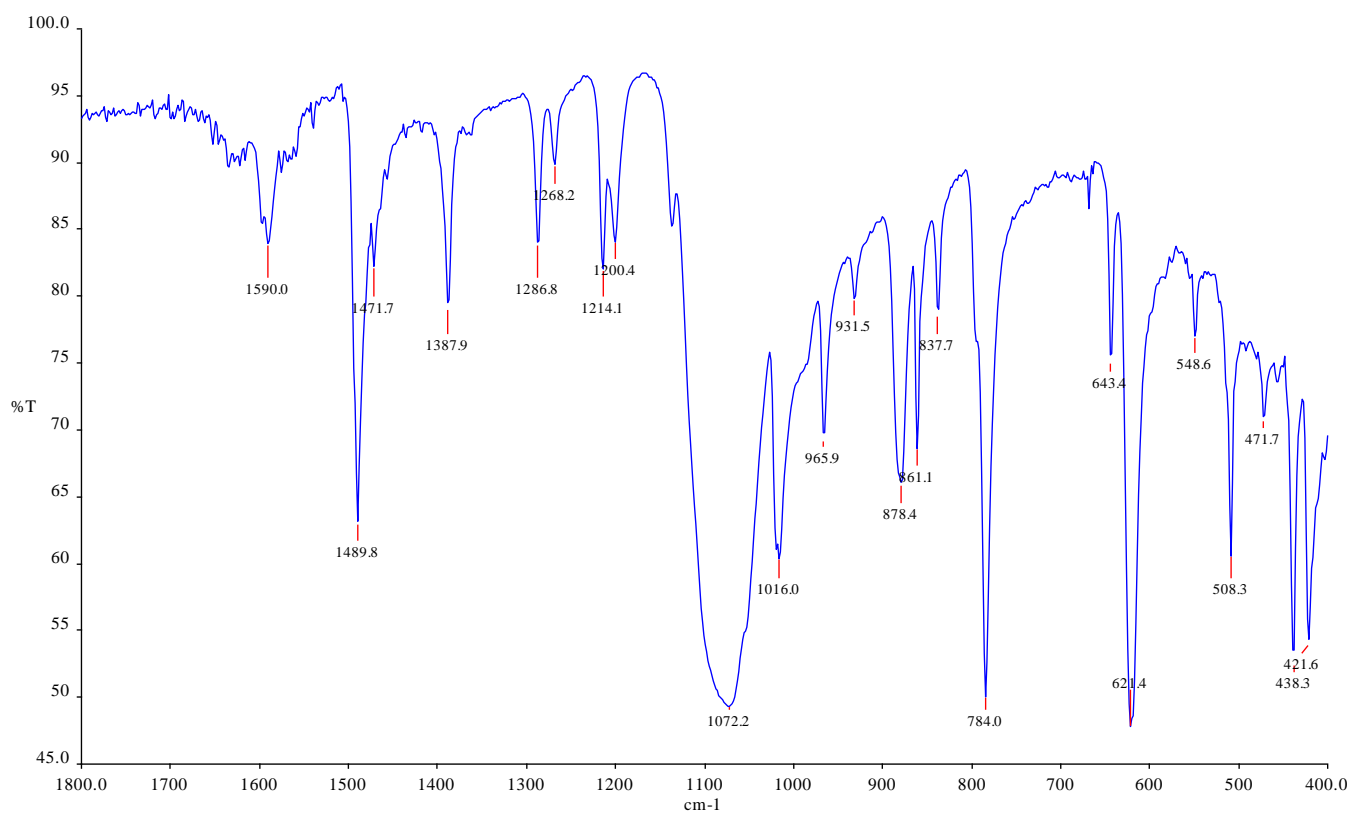

Compound  $[\text{Cu}(\text{tan})_4](\text{ClO}_4)_2(\text{H}_2\text{O})_2$  (**2**) blue

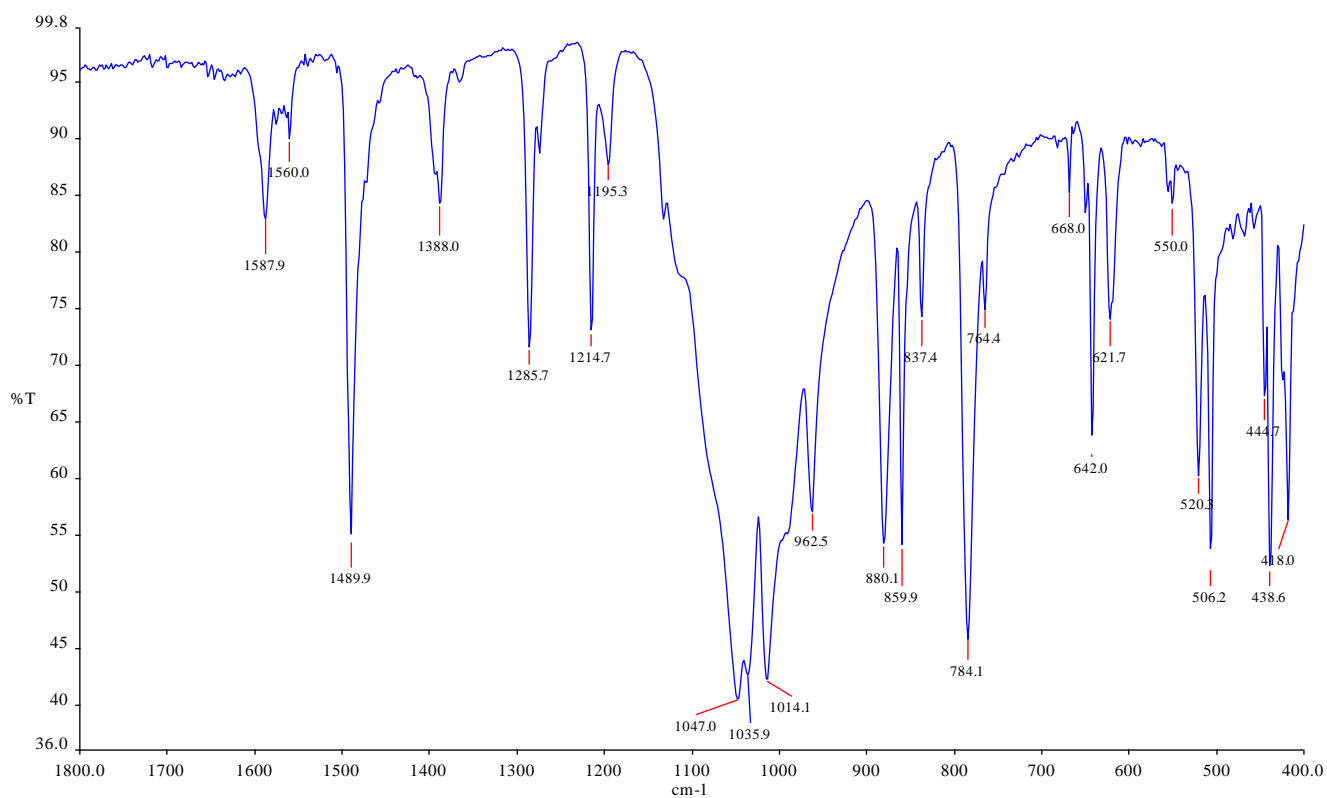

Compound  $[\text{Cu}(\text{tan})_4](\text{BF}_4)_2(\text{H}_2\text{O})_2$  (**4**) blue

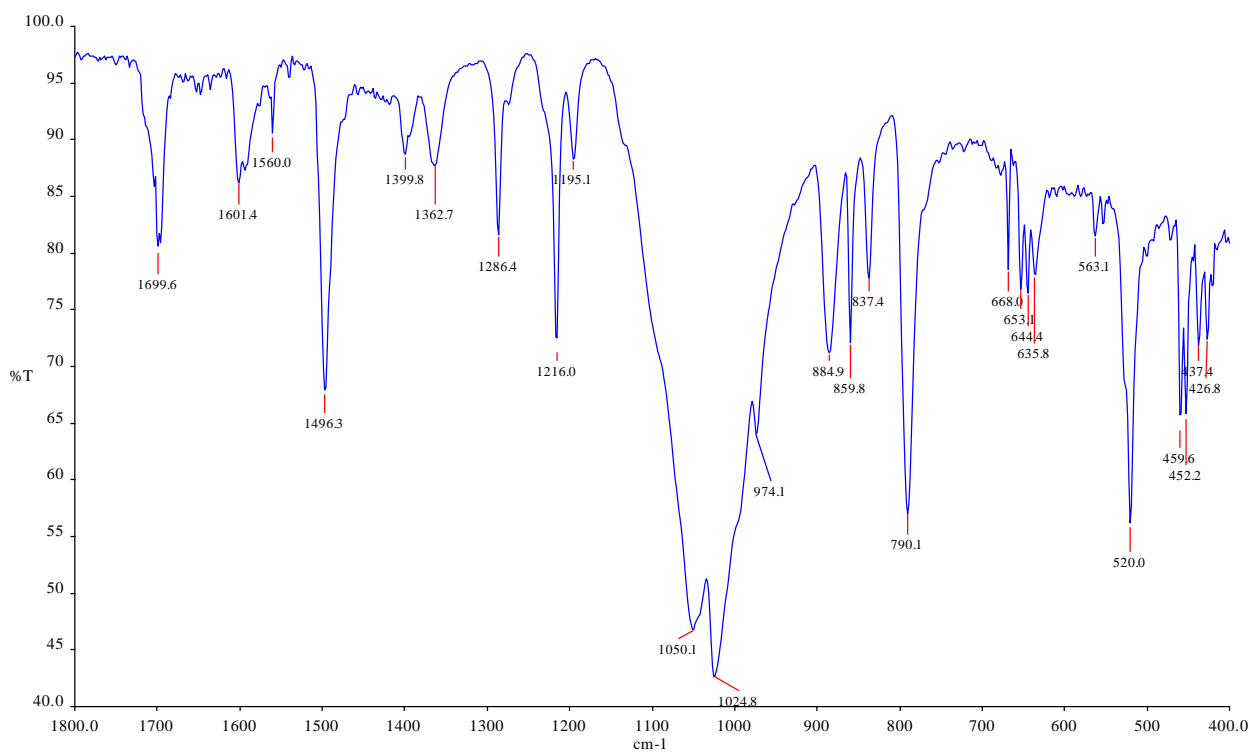

Compound  $[\text{Cu}_2(\text{tan})_4]_n(\text{BF}_4)_{3n}(\text{H}_2\text{O})_{6n}$  (**5/5A**) red

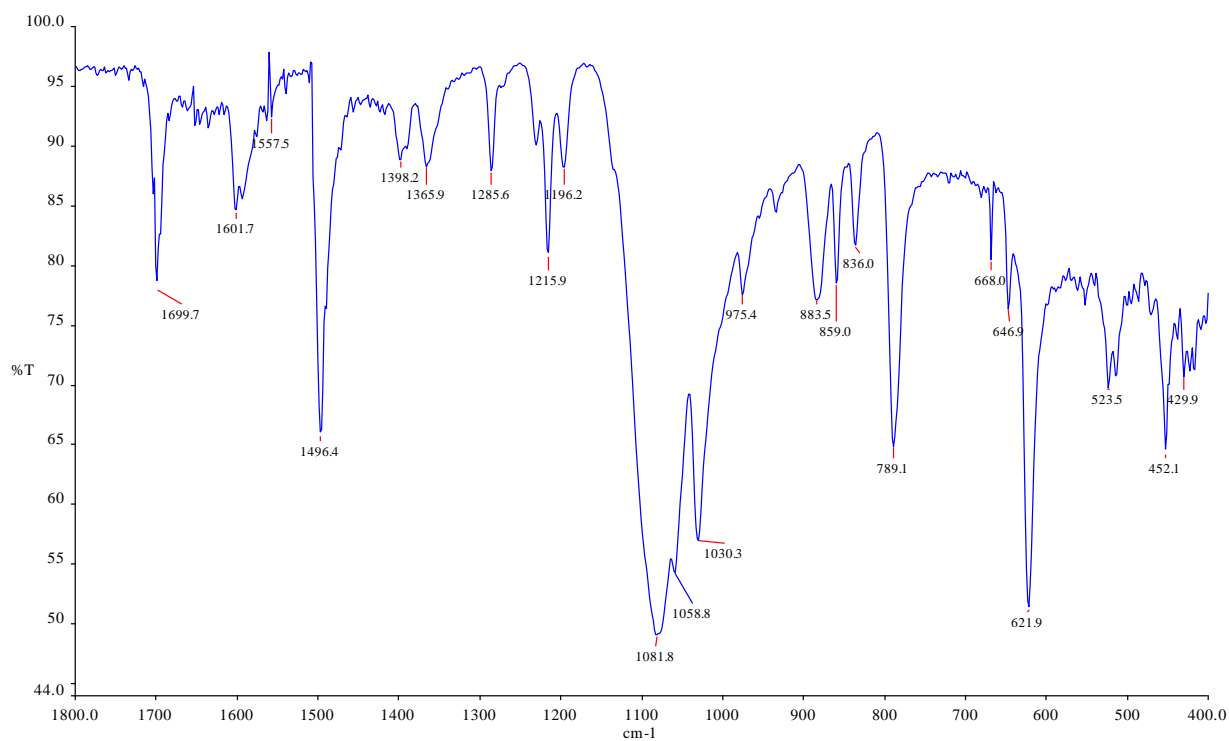

Compound  $[\text{Cu}_2(\text{tan})_4]_n(\text{ClO}_4)_{3n}(\text{H}_2\text{O})_{6n}$  (**6/6A**) red (from ref. 1)

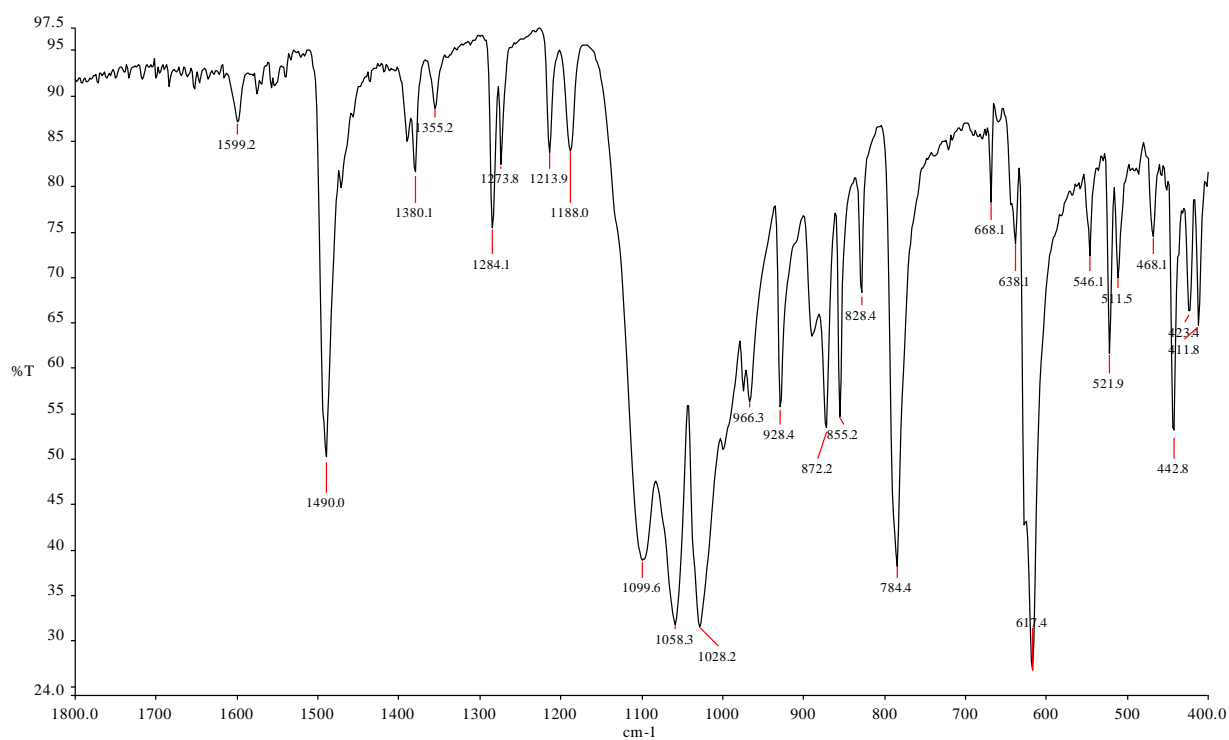

Compound  $[\text{Cu}_2(\text{tan})_3](\text{ClO}_4)_2$  (**7**) red.

Table S1. IR data of the Cu compounds with the ligand tan.

| Compound                                                                                                                                        | colour | IR <sup>a</sup>                                         | anions       |
|-------------------------------------------------------------------------------------------------------------------------------------------------|--------|---------------------------------------------------------|--------------|
| free ligand                                                                                                                                     |        | 1010 875 775 641 490 425 400                            |              |
| <b>2.</b> [Cu(tan) <sub>4</sub> ](ClO <sub>4</sub> ) <sub>2</sub> (H <sub>2</sub> O) <sub>2</sub> <sup>*</sup>                                  | blue   | 1016 878 784 643 508 438 421<br>621                     | 1072(br)     |
| <b>4.</b> [Cu(tan) <sub>4</sub> ](BF <sub>4</sub> ) <sub>2</sub> (H <sub>2</sub> O) <sub>2</sub>                                                | blue   | 1014 880 784 642 506 438 418<br>622                     | 1036<br>1047 |
| <b>5/5A.</b> [Cu <sub>2</sub> (tan) <sub>4</sub> ] <sub>n</sub> (BF <sub>4</sub> ) <sub>3n</sub> (H <sub>2</sub> O) <sub>6n</sub> <sup>**</sup> | red    | 1024 885 790 653 520 460 437<br>644 452 427             | 1050         |
| <b>6/6A</b> [Cu <sub>2</sub> (tan) <sub>4</sub> ] <sub>n</sub> (ClO <sub>4</sub> ) <sub>3n</sub> (H <sub>2</sub> O) <sub>6n</sub> <sup>**</sup> | red    | 1030 883 789 622 524 452 429(w)<br>514 422(w)<br>417(w) | 1059         |
| <b>7.</b> [Cu <sub>2</sub> (tan) <sub>3</sub> ](ClO <sub>4</sub> ) <sub>2</sub>                                                                 | red    | 1028 872 784 617 522 443 423(w)<br>512 412(w)           | 1058<br>1100 |

br = broad; w = weak; \* = X-ray structure done, \*\* = X-ray structure done, the X-ray crystal structures, with crystals directly from the mother liquid have the formula [Cu<sub>2</sub>(tan)<sub>4</sub>]<sub>n</sub>(BF<sub>4</sub>)<sub>3n</sub> (**5**), [Cu(tan)<sub>4</sub>]<sub>n</sub>(BF<sub>4</sub>)<sub>3n</sub>(CH<sub>3</sub>OH)<sub>n</sub>(H<sub>2</sub>O)<sub>5n</sub> (**5A**), [Cu<sub>2</sub>(tan)<sub>4</sub>]<sub>n</sub>(ClO<sub>4</sub>)<sub>3n</sub> (**6**) and [Cu<sub>2</sub>(tan)<sub>4</sub>]<sub>n</sub>(ClO<sub>4</sub>)<sub>3n</sub>(CH<sub>3</sub>OH)<sub>2n</sub> (**6A**), the dry compounds have the formula shown in this table (see experimental section)

<sup>a</sup> = strongest peaks of the ring vibration<sup>2,3</sup>

## References:

1. G. A. van Albada, M. Ghazzali, K. Al-Farhan, I. Mutikainen and J. Reedijk, *Inorg. Chem. Commun.*, 2011, **14**, 162-165.
2. W. L. Armarego, G. B. Barlin and E. Spinner, *Spectrochim. Acta*, 1966, **22**, 117-&.
3. H. J. Stoklosa, J. R. Wasson, E. V. Brown, H. W. Richardson and W. E. Hatfield, *Inorg. Chem.*, 1975, **14**, 2378-2382.
